# Supplementary material for: Hydrological signatures describing the translation of climate seasonality into streamflow seasonality
Source: Copernicus journal article supplement (doi:10.5194/hess-24-561-2020), 2020-02-06
Supplement: Supplementary file 1 [file hess-24-561-2020-supplement.pdf]

Supplement of Hydrol. Earth Syst. Sci., 24, 561–580, 2020  
<https://doi.org/10.5194/hess-24-561-2020-supplement>  
© Author(s) 2020. This work is distributed under  
the Creative Commons Attribution 4.0 License.

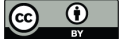

*Supplement of*

## **Hydrological signatures describing the translation of climate seasonality into streamflow seasonality**

**Sebastian J. Gnann et al.**

*Correspondence to:* Sebastian J. Gnann ([sebastian.gnann@bristol.ac.uk](mailto:sebastian.gnann@bristol.ac.uk))

The copyright of individual parts of the supplement might differ from the CC BY 4.0 License.

# S.1 The response of linear reservoirs to periodic forcing

The derivations in S.1.1-S.1.3 and the resulting equations are not novel. We think, however, that presenting them altogether might be a useful overview for the interested reader. General overviews on linear systems theory are given for example by [Dooge \(1973\)](#) for hydrology or by [Smith \(2007\)](#) for signal processing. The response of linear reservoirs to periodic forcing was for example described by [Eriksson \(1971\)](#) or [Peters et al. \(2003\)](#).

## S.1.1 Single linear reservoir

The outflow  $Q$  from a linear reservoir is described by Equation (S.1):

$$Q = \frac{S}{\tau} \quad (\text{S.1})$$

Conservation of mass requires that the rate of change of storage  $S$  equals the inflow  $Q_{in}$  minus the outflow  $Q$  from the reservoir:

$$\frac{dS}{dt} = Q_{in} - Q \quad (\text{S.2})$$

For simplicity, we consider a simple sinusoidal input signal with unit amplitude, with zero phase (i.e. aligned with the cycle of interest) and with zero mean. We also replace the period  $T$  by the angular frequency  $\omega = \frac{2\pi}{T}$ .

$$Q_{in}(t) = \sin(\omega t) \quad (\text{S.3})$$

Combining Equations (S.1), (S.2), and (S.3) yields:

$$\frac{dQ}{dt} + \frac{Q}{\tau} = \frac{\sin(\omega t)}{\tau} \quad (\text{S.4})$$

which is a first-order ordinary differential equation (ODE) that can be solved with the help of an integrating factor  $\exp(t/\tau)$  and by using the product rule:

$$\exp\left(\frac{t}{\tau}\right) \left(\frac{dQ}{dt} + \frac{Q}{\tau}\right) = \exp\left(\frac{t}{\tau}\right) \frac{\sin(\omega t)}{\tau} \quad (\text{S.5})$$

$$\frac{d}{dt} \left(\exp\left(\frac{t}{\tau}\right) Q\right) = \exp\left(\frac{t}{\tau}\right) \frac{\sin(\omega t)}{\tau} \quad (\text{S.6})$$

$$\left[\exp\left(\frac{t}{\tau}\right) Q\right]_0^t = \frac{1}{\tau} \int_0^t \exp\left(\frac{t}{\tau}\right) \sin(\omega t) dt \quad (\text{S.7})$$

$$\exp\left(\frac{t}{\tau}\right) Q(t) - Q(0) = \frac{1}{\tau} \int_0^t \exp\left(\frac{t}{\tau}\right) \sin(\omega t) dt \quad (\text{S.8})$$

Since we are interested in the steady-state periodic response of our system, we set  $Q(0) = 0$ . We can solve the integral on the right hand side using an integration rule (see e.g. [Spiegel, 1968](#)):

$$\exp\left(\frac{t}{\tau}\right) Q(t) = \frac{1}{\tau} \frac{\exp\left(\frac{t}{\tau}\right)}{\sqrt{\left(\frac{1}{\tau}\right)^2 + \omega^2}} \sin\left(\omega t + \arccos\left(\frac{1}{\tau \sqrt{\left(\frac{1}{\tau}\right)^2 + \omega^2}}\right)\right) \quad (\text{S.9})$$

$$Q(t) = \frac{1}{\sqrt{1 + (\omega\tau)^2}} \sin\left(\omega t + \arccos\left(\frac{1}{\sqrt{1 + (\omega\tau)^2}}\right)\right) \quad (\text{S.10})$$

If we rewrite  $A = \frac{1}{\sqrt{1+(\omega\tau)^2}}$  (Equation (9) in the corresponding manuscript) and  $\phi = \arccos(A)$  (Equation (10) in the corresponding manuscript), we obtain:

$$Q(t) = A \sin(\omega t + \phi) \quad (\text{S.11})$$

Since the system is linear, other inflow amplitudes can be accounted for by scaling (multiplication) and a non-zero mean by addition. We could also superimpose other inputs of different periods. Note that we can obtain the same result using the transfer function approach in linear systems theory, as for example described in [Dooge \(1973\)](#) or [Smith \(2007\)](#).

### S.1.2 Linear reservoirs in series

Linear reservoirs in series can be conceptualised as follows. The outflow from the first reservoir is the inflow to the second reservoir, the outflow from the second reservoir is the inflow to the third reservoir, and so forth. Let's denote the outflow from the first reservoir by  $Q_1$ :

$$Q_1(t) = A_1 \sin(\omega t + \phi_1) \quad (\text{S.12})$$

If we use Equation (S.12) as inflow to the second reservoir (which is also the total outflow), we obtain:

$$\frac{dQ_2}{dt} + \frac{Q_2}{\tau_2} = \frac{A_1 \sin(\omega t + \phi_1)}{\tau_2} \quad (\text{S.13})$$

This can be solved in a similar fashion as before (Equation (S.4)) and we get:

$$Q_2(t) = A_1 A_2 \sin(\omega t + \phi_1 + \phi_2) \quad (\text{S.14})$$

If we continue to do this for  $n$  reservoirs, we get:

$$Q_n(t) = A_1 A_2 \dots A_n \sin(\omega t + \phi_1 + \phi_2 + \dots + \phi_n) \quad (\text{S.15})$$

$$Q_n(t) = \prod_{i=1}^n A_i \sin\left(\omega t + \sum_{i=1}^n \phi_i\right) \quad (\text{S.16})$$

The total amplitude ratio is thus obtained by multiplication of all individual amplitude ratios and the total phase shift by addition of all individual phase shifts. If all the reservoirs have the same time constant ( $\tau_1 = \tau_2 = \dots = \tau_n$ ), we obtain the so called Nash cascade ([Nash, 1957](#)).

### S.1.3 Linear reservoirs in parallel

Linear reservoirs in parallel are the weighted sum of the outflow from each reservoir. The resulting flow is hence a sum of sine waves of the same angular frequency, weighted by the fraction  $p_i$  going into each reservoir. For two reservoirs we can write:

$$Q_{12}(t) = Q_1(t) + Q_2(t) \quad (\text{S.17})$$

where  $Q_{12}$  is the combined outflow from the two reservoirs  $Q_1$  and  $Q_2$ . We can use Equation (S.11) to get the outflow from each of the two reservoirs:

$$Q_{12}(t) = p_1 A_1 \sin(\omega t + \phi_1) + p_2 A_2 \sin(\omega t + \phi_2) \quad (\text{S.18})$$

The sum of two sine waves (Equation (S.18)) can be rewritten to obtain only one sine wave:

$$Q_{12}(t) = p_1 A_1 \sin(\omega t + \phi_1) + p_2 A_2 \sin(\omega t + \phi_2) \quad (\text{S.19})$$

$$Q_{12}(t) = A_{12} \sin(\omega t + \phi_{12}) \quad (\text{S.20})$$

where the total amplitude ratio  $A_{12}$  (Equation (14) in the corresponding manuscript) and the total phase shift  $\phi_{12}$  (Equation (15) in the corresponding manuscript) are given by (see e.g. [Smith, 2007](#)):

$$A_{12} = \sqrt{[p_1 A_1 \cos \phi_1 + p_2 A_2 \cos \phi_2]^2 + [p_1 A_1 \sin \phi_1 + p_2 A_2 \sin \phi_2]^2} \quad (\text{S.21})$$

$$\phi_{12} = \arctan \left( \frac{p_1 A_1 \sin \phi_1 + p_2 A_2 \sin \phi_2}{p_1 A_1 \cos \phi_1 + p_2 A_2 \cos \phi_2} \right) \quad (\text{S.22})$$

We could do the same for more ( $n$ ) reservoirs by stepwise adding the resulting sine wave to the next sine wave (e.g.  $Q_{12} + Q_3$ ).

### S.1.4 Non-linear reservoirs

In the following we investigate how non-linear reservoirs respond to periodic forcing. A non-linear reservoir can be described by ([Kirchner, 2009](#)):

$$Q = Q_{\text{ref}} \left( \frac{S - S_0}{m} \right)^n \quad (\text{S.23})$$

where  $Q_{\text{ref}}$  is an arbitrary reference discharge,  $S_0$  is a reference storage,  $m$  is a scaling coefficient (it has the units of storage), and  $n$  is a non-linearity parameter ( $n = 1$  results in the linear reservoir). For non-linear reservoirs, there are no general analytical solutions available. Non-linear reservoirs cannot be characterised by an invariant time constant, as their outflow rate depends on the storage, as it can be seen from Equation (S.23). Hence, we model the response of a single non-linear reservoir numerically.

The outflow from a non-linear reservoir forced by a sinusoidal input is shown in Figure S.1. The outflow is still periodic, but the "sine curve" is somewhat squeezed. The maxima and minima do not have the same distance and hence there is no unique phase shift. For the example shown in Figure S.1, the phase shift between the maxima of  $Q_{\text{in}}$  and  $Q_{\text{out}}$  is 68 days, and the phase shift between the minima is 70 days. The difference between the maximum amplitude and the mean amplitude ( $= 0.49$  mm) is 0.20 mm, and the difference between the minimum amplitude and the mean amplitude is 0.18 mm. This asymmetry is partly due to numerical inaccuracies, however, probably mostly due to the non-linearity of the reservoir. Because non-linear reservoirs with  $n > 1$  drain more slowly as they empty, their minima are closer to the mean and the minima have a larger phase shift (and vice versa for  $n < 1$ ).

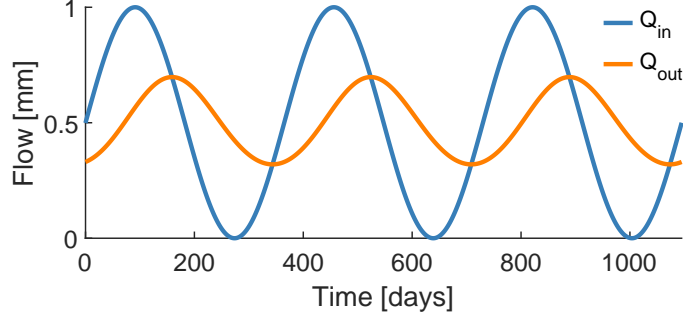

Figure S1: Numerical approximation of steady-state (sinusoidal) inflow to and outflow from a non-linear reservoir ( $Q_{\text{ref}} = 1 \text{ mm}$ ,  $S_0 = 0 \text{ mm}$ ,  $m = 200 \text{ mm}$ ,  $n = 2$ ). The starting time is chosen arbitrarily.

We can plot amplitude ratios and phase shifts for non-linear reservoirs with different parameter values. We therefore do not need to specify a characteristic time constant. This is shown in Figure S.2. Even though the outflow is not exactly a sine wave, it is possible to define a mean phase shift and amplitude ratio, and in practice this might be a reasonably good approximation and hardly distinguishable from an actual sine wave. So, even if the reservoir is non-linear, its steady state behaviour (or the response to seasonal inputs) might be reasonably well approximated by a linear reservoir with a time constant that reflects the outflow characteristics at a characteristic storage level (e.g. mean storage).

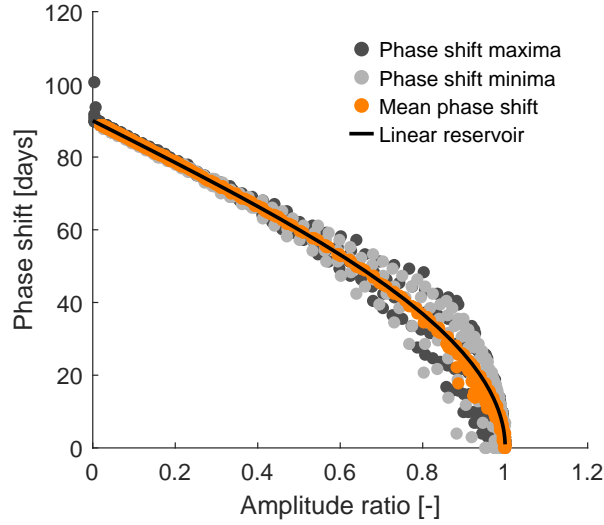

Figure S2: Amplitude ratio and phase shift for a single non-linear reservoir for varying parameter values. The phase shifts of the maxima, the minima, and the mean phase shifts are indicated by coloured dots. The non-linearity parameter  $n$  ranges from 0.5 to 10.

## S.2 Additional analyses

### S.2.1 Extracting seasonal components from time series

We have tested two methods to extract seasonal components from time series. The first method is a multiple linear regression. The second method makes use of the cross-covariance of two time series, both are described below.

#### S.2.1.1 Multiple linear regression

A basic sine wave is given by:

$$x(t) = \delta_x \bar{x} \sin(2\pi \frac{t}{T} - \phi_x) + \bar{x} \quad (\text{B.24})$$

We can rewrite Equation (B.24) as follows (see e.g. [Kirchner, 2016](#)):

$$x(t) = \alpha \cos(2\pi \frac{t}{T}) + \beta \sin(2\pi \frac{t}{T}) + \bar{x} \quad (\text{B.25})$$

We can rewrite Equation (B.25) in vector form:

$$\begin{bmatrix} \cos(2\pi \frac{t_1}{T}) & \sin(2\pi \frac{t_1}{T}) & 1 \\ \cos(2\pi \frac{t_2}{T}) & \sin(2\pi \frac{t_2}{T}) & 1 \\ \vdots & \vdots & \vdots \\ \cos(2\pi \frac{t_n}{T}) & \sin(2\pi \frac{t_n}{T}) & 1 \end{bmatrix} \cdot \begin{bmatrix} \alpha \\ \beta \\ \bar{x} \end{bmatrix} = \begin{bmatrix} x(t_1) \\ x(t_2) \\ \vdots \\ x(t_n) \end{bmatrix} \quad (\text{B.26})$$

We can solve for  $\alpha$ ,  $\beta$  and  $\bar{x}$  in Equation (B.26) by means of multiple linear regression (e.g. by using Matlab's *mldivide* function). We can then solve for  $\delta_x$  and  $\phi_x$  via the identities:

$$\delta_x \bar{x} = \sqrt{\alpha^2 + \beta^2} \quad (\text{B.27})$$

$$\phi_x = \arctan\left(\frac{\beta}{\alpha}\right) \quad (\text{B.28})$$

Note that the *atan2* function is required to obtain an unambiguous phase shift.

#### S.2.1.2 Cross-covariance method

The unbiased estimate of the cross-covariance of two sine waves  $x$  and  $y$  is given by:

$$\gamma_{xy}(k) = \frac{1}{2} \delta_x \bar{x} \delta_y \bar{y} \cos\left((\phi_x - \phi_y) - 2\pi \frac{t}{T} k\right) \quad (\text{B.29})$$

where  $k$  is the lag between the sine waves,  $\delta_x \bar{x}$  and  $\delta_y \bar{y}$  are their amplitudes, and  $\phi_x$  and  $\phi_y$  are their phase shifts. If we define  $x$  to be the signal of interest (e.g. streamflow) and  $y$  to be a dummy cycle of unit amplitude and zero initial phase shift ( $\delta_y \bar{y} = 1$  and  $\phi_y = 0$ ), Equation (B.29) simplifies to:

$$\gamma_{xy}(k) = \frac{1}{2} \delta_x \bar{x} \cos\left(\phi_x - 2\pi \frac{t}{T} k\right) \quad (\text{B.30})$$

We can calculate the empirical cross-correlation between the signal of interest and the dummy cycle and fit a sine curve to it (via nonlinear least squares). The parameters of that sine curve can then be used to find the parameters of our cycle of interest ( $\delta_x \bar{x}$  and  $\phi_x$ ) via Equation (B.30).

The fitting methods (multiple linear regression and cross-covariance method) show an almost perfect match (Figure S.3), which indicates that the extraction of the seasonal component is not sensitive to the method. While this means that we can reliably extract the sinusoidal component of the period of interest (1 year), i.e. the annual Fourier mode, it does not mean that we perfectly extracted the "(annual) seasonal component" of the variable of interest. A sine wave is just a parsimonious approximation of the seasonal behaviour and the choice of a sine wave to model seasonality is also associated with uncertainty.

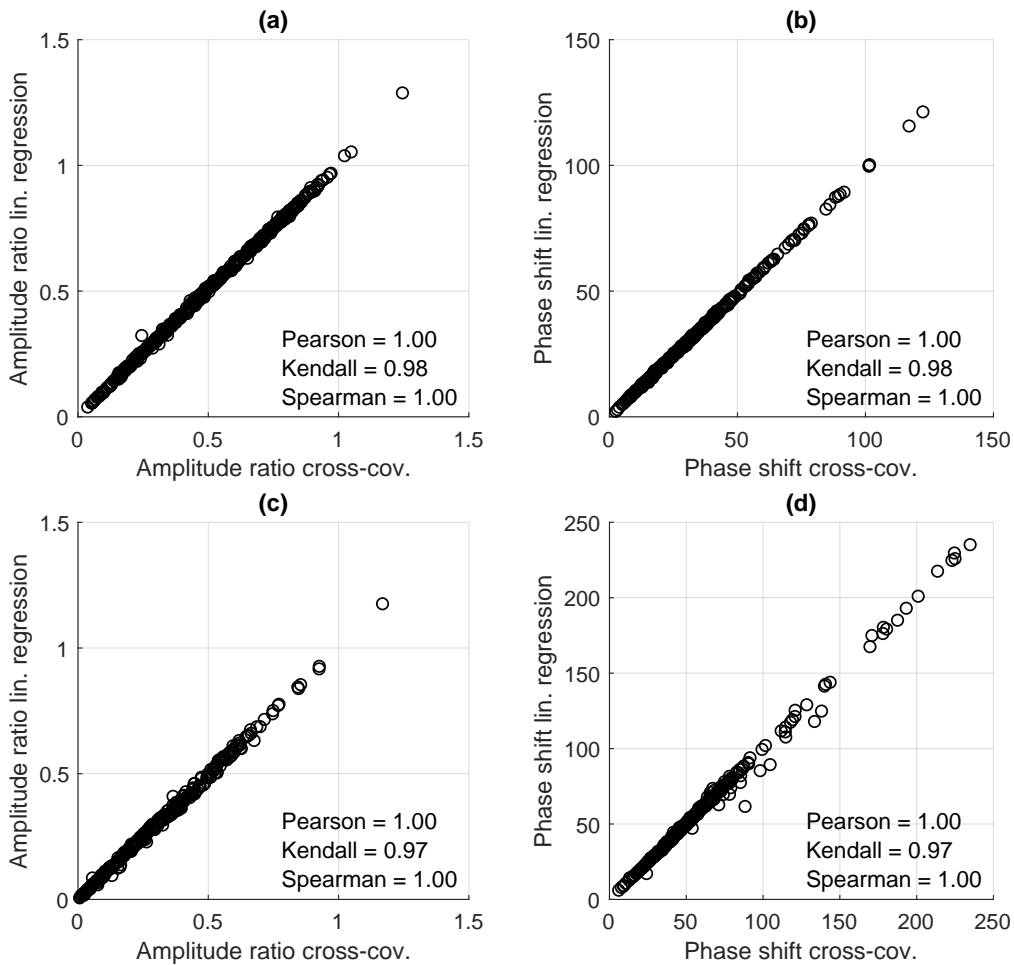

Figure S3: Comparison of amplitude ratio and phase shift using the different sine fitting methods for UK catchments from 1989 to 2009. Panel (a) and (b) show UK catchments. Panel (c) and (d) show CAMELS catchments. Note that both axes are limited.

### S.2.1.3 Robustness of seasonal signatures

To check whether the seasonal signatures are robust, we calculate the signatures for two different time periods: from 1989 to 1999, and from 1999 to 2009.

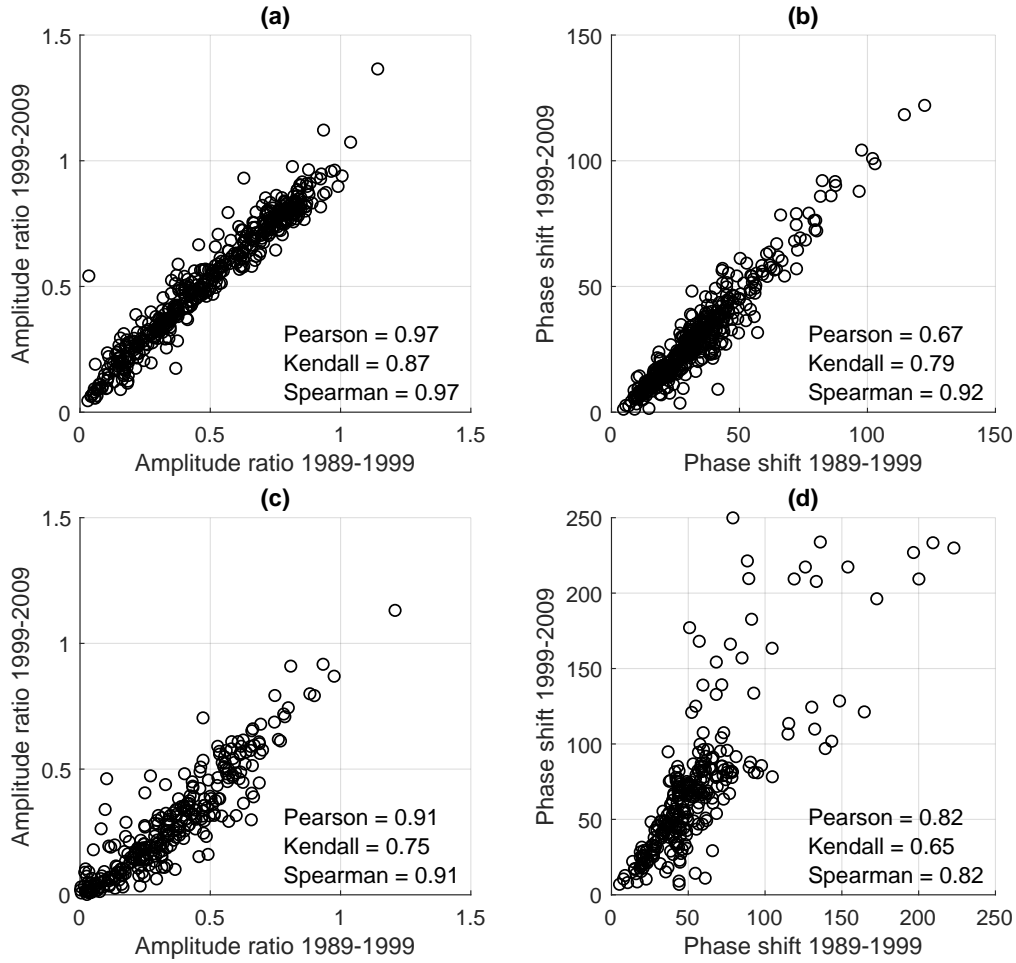

Figure S4: Comparison of amplitude ratio and phase shift using different time periods. Panel (a) and (b) show UK catchments. Panel (c) and (d) show CAMELS catchments. Note that both axes are limited.

Figure S.4 shows that the amplitude ratio and the phase shift show good agreement for the different time periods analysed. This means that the period from 1989 to 1999 does not exhibit a fundamentally different behaviour than the period from 1999 to 2009, i.e. the signatures are robust. Some variability can be expected as the forcing varies from year to year, due to human influences (UK), and because the signatures can be unreliable particularly in arid climates (US).

## S.2.2 Fourier spectra of forcing and streamflow

To check whether the annual periodic component (annual Fourier mode) is the strongest periodic component of our time series, we can calculate one-sided power spectra for all catchments. For almost every catchment investigated here (> 99%) the strongest forcing Fourier mode is the annual mode. For a few catchments in the US a 0.5 year mode is the strongest mode, yet there is also an annual mode present. Some of the streamflow data have strongest modes different from one year, yet again there is also an annual mode present. Figure S.5 shows one sided power spectra for two catchments (the same catchments as shown in Figure 4 of the corresponding manuscript). We can see that in both catchments the annual mode is the strongest mode. Figure S.5b also shows a strong multi-annual mode (of about 7 years, see also Rust



et al., 2019, for more information on multi-annual modes in the UK).

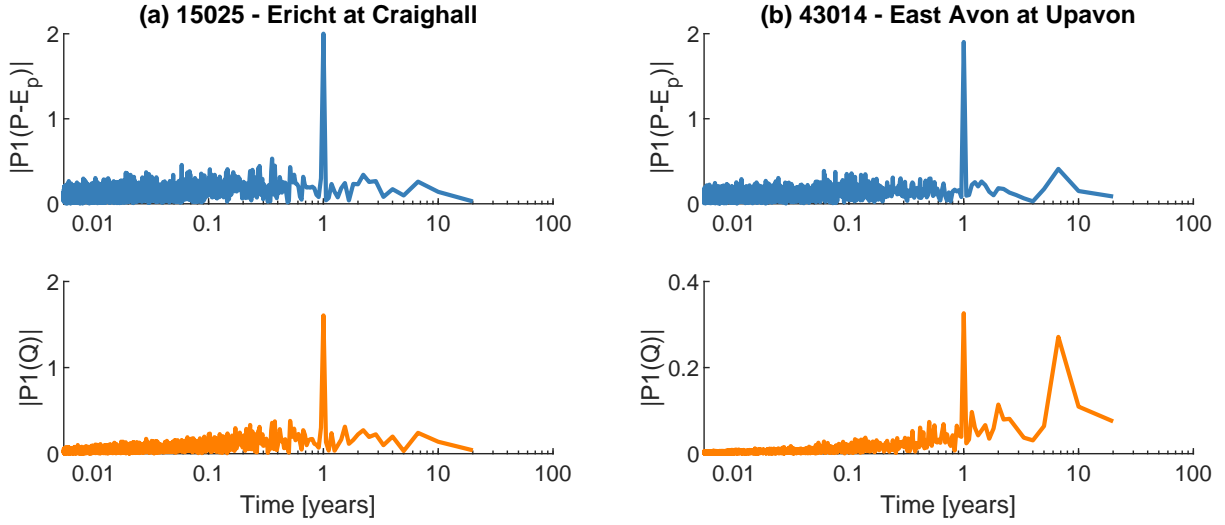

Figure S5: One sided power spectra of climate input ( $P - E_p$ ; blue) and catchment output ( $Q$ ; orange) for two catchments in the UK, and their respective seasonal components. The Erich is a rather responsive catchment ( $BFI = 0.47$ ), while the East Avon has a large baseflow component ( $BFI = 0.89$ ).

### S.2.3 Catchments with precipitation falling as snow

Snow presents a different storage process that is not considered in the current approach. We therefore remove snowy catchments, defined as catchments with a snow fraction  $f_s$  (Knoben et al., 2018) larger than 0.001, from the analysis. Figure S.6 shows the snowy catchments and the corresponding snow fraction.

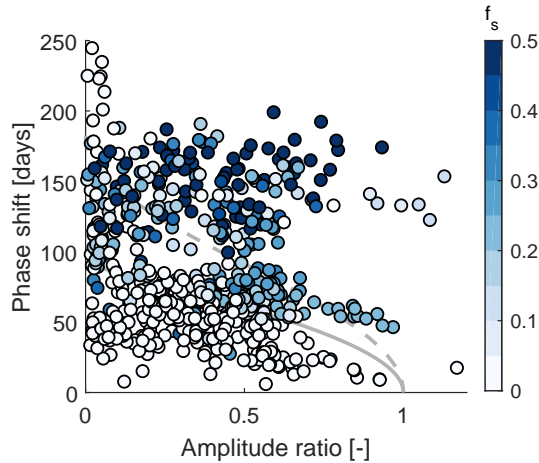

Figure S6: Amplitude ratio against phase shift for CAMELS catchments. Colour indicates the fraction of precipitation falling as snow. Note that both axes are limited.

## S.2.4 On the use of potential evapotranspiration as input signal

As mentioned in the corresponding manuscript, we use precipitation  $P$  minus potential evapotranspiration  $E_p$  as a proxy for the input signal to a catchment (the forcing  $F$ ). To test the validity of the assumption that  $E_a = E_p$  in a rather straightforward manner, we adjust the seasonal component of  $E_p$  to obtain  $E_a$  by means of the Budyko framework (Budyko, 1974). We reduce the peak of the seasonal component of  $E_p$  so that it equals the mean of  $E_a$ , which we estimate using the following equation (Budyko, 1974):

$$\frac{\bar{E}_a}{\bar{P}} = \sqrt{\frac{\bar{E}_p}{\bar{P}} \tanh\left(\frac{\bar{P}}{\bar{E}_p}\right) \left(1 - \exp\left(-\frac{\bar{E}_p}{\bar{P}}\right)\right)} \quad (\text{B.31})$$

We therefore obtain a new sine curve for the seasonal component of  $E_a$ , which has a reduced amplitude ( $\delta_{E_a} \bar{E}_a$ ) and a reduced mean ( $\bar{E}_a$ ), but the same phase as the sine curve for the seasonal component of  $E_p$ . This will increase the amplitude ratio and might change the phase shift whenever  $\bar{E}_a < \bar{E}_p$ .

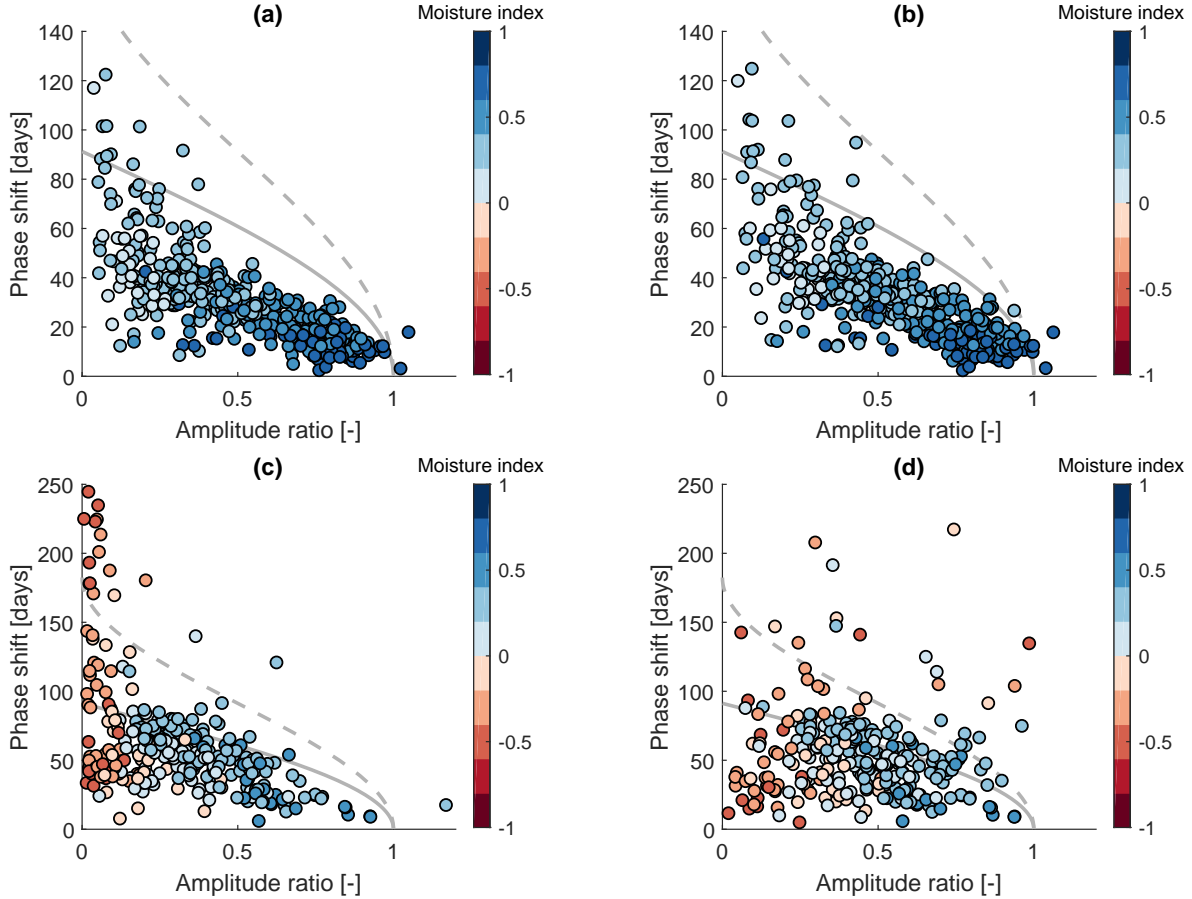

Figure S7: Amplitude ratio against phase shift for (a) UK catchments and (c) CAMELS catchments using potential evapotranspiration in the forcing ( $F = P - E_p$ ) and for (b) UK catchments and (d) CAMELS catchments using estimated actual evapotranspiration in the forcing ( $F = P - E_a$ ). Grey solid line indicates a single linear reservoir, grey dashed line indicates the outer envelope for two reservoirs in parallel. Colours indicate the moisture index. Note that both axes are limited and that the y-axes differ in their range.

Figure S.7 shows the resulting amplitude ratios and phase shifts for the UK and the US together with the ones using  $E_p$  as input. Energy-limited catchments (high  $I_m$ ), in particular the UK catchments, show a similar pattern for  $E_p$  and estimated  $E_a$ . The amplitude ratios are slightly higher, i.e. the whole point cloud is slightly shifted to the right. In water-limited catchments in the US, where the annual water balance already implies that  $E_a < E_p$ , the amplitude ratios are often higher and the phase shifts smaller. Many of the dark red dots that are close to zero in Figure S.7b now plot much further to the right (Figure S.7d). Some of the large phase shifts in these arid catchments might still be a consequence of a poorly estimated input signal. The approach based on the Budyko framework (Equation (B.31)) only reduces the amplitude of the evapotranspiration component, it does not change the timing of  $E_a$  compared to  $E_p$ . In reality, however, it is possible (and likely) that  $E_a$  also has a different phase compared to  $E_p$ . Especially in catchments where  $P$  and  $E_p$  are out of phase, the soil moisture reservoir will fill up during the wet months (peak rainfall) and dry out during the dry months (peak evapotranspiration). If  $E_p \gg P$ , the soil will likely dry out before we reach peak  $E_p$ , and hence we reach peak  $E_a$  before peak  $E_p$ . The difference in the  $P$  peak and the  $E_p$  peak (e.g. the phase shift we observe in Figure S.7) would therefore be larger than the difference between the  $P$  peak and the  $E_a$  peak (i.e. the actual phase shift caused by the catchment). To overcome that, we would either need modelled  $E_a$ , e.g. from a (simple) hydrological model, or measured  $E_a$ . Modelling  $E_a$  comes at the cost of introducing more modelling steps and therefore more complexity. Measurements of  $E_a$  are typically not available at a daily time scale. We therefore leave this for future work.

### S.3 Modelling experiment

We use two common rainfall-runoff models from the MARRMoT rainfall-runoff modelling toolbox (Knoben et al., 2019): IHACRES and GR4J. The parameter ranges are specified in Tables 1 and 2. The parameter ranges for IHACRES mostly follow the MARRMoT default values. The fast flow routing delay  $\tau_q$  is set to range from 0.0001 to 10 days to represent fast flow (the default range is from 1 to 700 days). The flow delay  $\tau_d$  (a pure delay function) is set to 0 (inactive) which makes the model conceptually equal to the version used by Croke and Jakeman (2004). The parameter ranges for GR4J are equal to the ranges used by Smith et al. (2019).

We determine the initial storages by repeatedly simulating the first water year, using the storages at the end of the year as new initial storages, until we reach an equilibrium ( $< 1\%$  change) or 20 iterations (in case of non-convergence).

Table 1: Parameter ranges for IHACRES. \*This parameter is inactive.

| Parameter    | Unit | Description                   | Min    | Max  |
|--------------|------|-------------------------------|--------|------|
| $lp$         | mm   | Wilting point                 | 0      | 2000 |
| $d$          | mm   | Threshold for flow generation | 0      | 2000 |
| $p$          | -    | Flow response non-linearity   | 0      | 10   |
| $\alpha$     | -    | Fast/slow flow division       | 0      | 1    |
| $\tau_q$     | d    | Fast flow routing delay       | 0.0001 | 10   |
| $\tau_s$     | d    | Slow flow routing delay       | 1      | 700  |
| $(\tau_d^*)$ | d    | Flow delay                    | 0      | 0)   |

Table S2: Parameter ranges for GR4J.

| Parameter | Unit               | Description                   | Min    | Max  |
|-----------|--------------------|-------------------------------|--------|------|
| $x_1$     | mm                 | Maximum soil moisture storage | 0.0001 | 3000 |
| $x_2$     | mm d <sup>-1</sup> | Subsurface water exchange     | -20    | 20   |
| $x_3$     | -                  | Routing store depth           | 0.0001 | 2000 |
| $x_4$     | mm                 | Unit hydrograph time base     | 0.5    | 15   |

### S.3.1 Subset of catchments for modelling experiment

The subset of catchments is chosen as follows. We only use benchmark catchments (Harrigan et al., 2018) and remove the catchments with a low flow score of 0 and with any missing values between 1989 and 2009. The remaining set of catchments is manually thinned out to evenly occupy the signature space shown in Figure 5 in the corresponding manuscript. Figure S.8 shows amplitude ratios, phase shifts, and BFIs of the subset.

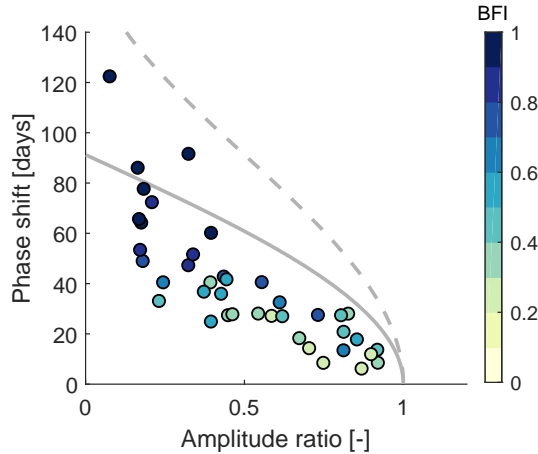

Figure S8: Amplitude ratio against phase shift for the subset of UK catchments used in the modelling experiment. Grey solid line indicates a single linear reservoir, grey dashed line indicates the outer envelope for two reservoirs in parallel. Colours indicate the BFI.

### S.3.2 Robustness of parameter sampling

To test whether the sample size used in the modelling experiment is large enough, we run the models with 2000, 5000, 10000, and 20000 parameter sets, respectively, all generated using Latin Hypercube sampling. The results from all 40 catchments (see Figure S.8) are summarised using box plots. The results are shown in Figure S.9 for IHACRES, and in Figure S.10 for GR4J.

While small differences are visible, the overall pattern is stable. While sampling more parameter sets is unlikely to change the results (except perhaps for some "outliers"), sampling with a different sampling scheme might influence the shapes of the resulting probability distributions. Furthermore, using different parameter ranges might affect the results.

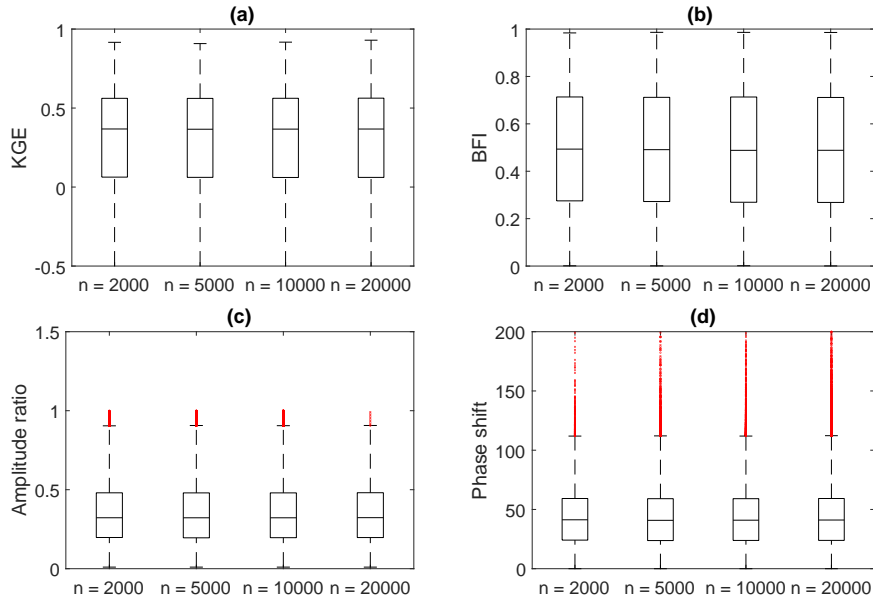

Figure S9: Box plots summarising model performances for different parameter sample sizes for 40 UK catchments for IHACRES. Boxes indicate the median (middle), the 25th (bottom) and 75th (top) percentiles, respectively. Whiskers show the range of data points not considered outliers. Outliers are shown in red. The metrics used are **(a)** KGE, **(b)** BFI, **(c)** amplitude ratio, and **(d)** phase shift. Note that the  $y$ -axes are limited.

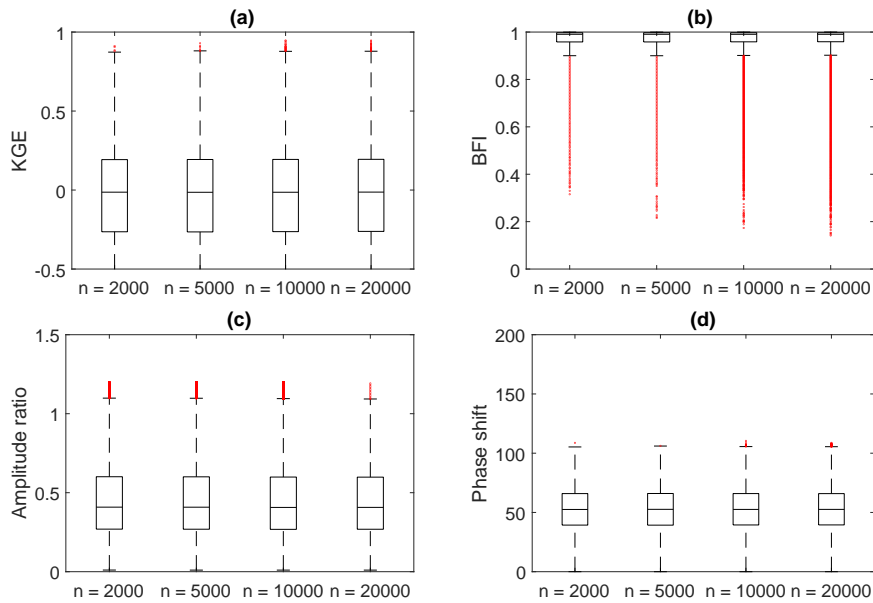

Figure S10: Box plots summarising model performances for different parameter sample sizes for 40 UK catchments for GR4J. Boxes indicate the median (middle), the 25th (bottom) and 75th (top) percentiles, respectively. Whiskers show the range of data points not considered outliers. Outliers are shown in red. The metrics used are **(a)** KGE, **(b)** BFI, **(c)** amplitude ratio, and **(d)** phase shift. Note that the  $y$ -axes are limited.

## References

- Budyko, M. I. (1974). *Climate and Life: English Ed. edited by David H. Miller*. Academic Press.
- Croke, B. F. and Jakeman, A. J. (2004). A catchment moisture deficit module for the IHACRES rainfall-runoff model. *Environmental Modelling and Software*, 19(1):1–5.
- Dooge, J. (1973). *Linear theory of hydrologic systems*. Number 1468. Agricultural Research Service, US Department of Agriculture.
- Eriksson, E. (1971). Compartment models and reservoir theory. *Annual Review of Ecology and Systematics*, 2(1):67–84.
- Harrigan, S., Hannaford, J., Muchan, K., and Marsh, T. J. (2018). Designation and trend analysis of the updated UK Benchmark Network of river flow stations: the UKBN2 dataset. *Hydrology Research*, 49(2):552–567.
- Kirchner, J. W. (2009). Catchments as simple dynamical systems: Catchment characterization, rainfall-runoff modeling, and doing hydrology backward. *Water Resources Research*, 45(2):1–34.
- Kirchner, J. W. (2016). Aggregation in environmental systems – Part 1: Seasonal tracer cycles quantify young water fractions, but not mean transit times, in spatially heterogeneous catchments. *Hydrology and Earth System Sciences*, 20(1):279–297.
- Knoben, W. J. M., Freer, J. E., Fowler, K. J. A., Peel, M. C., and Woods, R. A. (2019). Modular Assessment of Rainfall–Runoff Models Toolbox (MARRMoT) v1.2: an open-source, extendable framework providing implementations of 46 conceptual hydrologic models as continuous state-space formulations. *Geoscientific Model Development*, 12(6):2463–2480.
- Knoben, W. J. M., Woods, R. A., and Freer, J. E. (2018). A quantitative hydrological climate classification evaluated with independent streamflow data. *Water Resources Research*, 54(7):5088–5109.
- Nash, J. E. (1957). The form of the instantaneous unit hydrograph. *International Association of Scientific Hydrology*.
- Peters, E., Torfs, P. J., van Lanen, H. A., and Bier, G. (2003). Propagation of drought through groundwater – A new approach using linear reservoir theory. *Hydrological Processes*, 17(15):3023–3040.
- Rust, W., Holman, I., Bloomfield, J., Cuthbert, M., and Corstanje, R. (2019). Understanding the potential of climate teleconnections to project future groundwater drought. *Hydrology and Earth System Sciences*, 23(8):3233–3245.
- Smith, J. O. (2007). *Introduction to Digital Filters: with Audio Applications*, volume 2.
- Smith, K. A., Barker, L. J., Tanguy, M., Parry, S., Harrigan, S., Legg, T. P., Prudhomme, C., and Hannaford, J. (2019). A multi-objective ensemble approach to hydrological modelling in the uk: an application to historic drought reconstruction. *Hydrology and Earth System Sciences*, 23(8):3247–3268.
- Spiegel, M. R. (1968). *Mathematical Handbook of Formulas and Tables*. McGraw-Hill.
